# Supplementary material for: Proteomic and transcriptomic study of brain microvessels in neonatal and adult mice
Source: PLoS One. 2017 Jan 31;12(1):e0171048. doi: 10.1371/journal.pone.0171048 (PMC5283732; doi:10.1371/journal.pone.0171048)
Supplement: S3 File — (PDF) [file pone.0171048.s003.pdf]

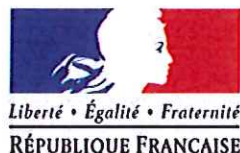

MINISTÈRE DE L'ÉDUCATION NATIONALE,  
DE L'ENSEIGNEMENT SUPÉRIEUR ET DE LA RECHERCHE

Paris, le **13 OCT. 2014**

Direction générale  
de la recherche  
et de l'innovation

Service de la performance,  
du financement et de la  
contractualisation avec les  
organismes de recherche

Département de la culture  
scientifique et des relations  
avec la société

Expérimentation animale -  
Autorisation de projet

Affaire suivie par  
Virginie Vallet-Erdtmann  
Chargée de mission

Téléphone  
01 55 55 99 55  
Fax  
01 55 55 99 59  
Mél.  
Virginie.vallet-erdtmann  
@recherche.gouv.fr

1 rue Descartes  
75231 Paris Cedex 05

**Objet : Notification d'autorisation de projet utilisant des animaux à des fins scientifiques**

Monsieur,

En application des dispositions du code rural et de la pêche maritime, notamment ses articles R. 214-87 à R.214-126, le projet :

- référencé sous le numéro 01680.02,
- ayant pour titre : « *Recherche d'agents thérapeutiques à visée neuroprotectrice vis-à-vis des lésions cérébrales périnatales. Modélisation de plusieurs types de lésions (ischémiques, hémorragiques ou toxiques) chez la Souris.* »,
- déposé par l'Établissement Utilisateur : UFR Médecine-Pharmacie, numéro d'agrément B7645005 dont le responsable est Monsieur Pierre Fréger,
- et dont les responsables de la mise en œuvre générale du projet et de sa conformité à l'autorisation sont Monsieur Bruno Gonzalez, Madame Sylvie Jegou, Monsieur Philippe Leroux, Madame Carine Cleren, Madame Isabelle Leroux-Nicollet, Madame Nathalie Dourmap, Madame Carole Brasse-Lagnel, Madame Michèle Hauchecorne,

est autorisé.

L'autorisation de projet est accordée pour une durée de 5 ans à partir du

**13 OCT. 2014**

Le projet est autorisé sous réserve de l'obtention formelle de l'agrément par l'Établissement Utilisateur.

Le projet précité a été évalué sur le plan éthique par le Comité d'éthique en expérimentation animale n°54 et a reçu un avis favorable.

Toutefois, le comité d'éthique a proposé le reclassement des procédures expérimentales n°1, n°2, n°3 et n°4 du projet, de la classe « légère » à la classe « modérée ».

Ce projet ne fera pas l'objet, à l'issue de sa réalisation, d'une appréciation rétrospective.

Pour la ministre et par délégation  
le chef du service de la performance, du  
financement et de la contractualisation avec  
les organismes de recherche

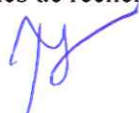  
Éric BERNET

Monsieur Pierre Fréger  
[pierre.freger@univ-rouen.fr](mailto:pierre.freger@univ-rouen.fr)
